# Supplementary material
Source: PubMed Central journal article supplement (PMC3967030)
Supplement: supp_tpc.113.121350_tpc121350_Supplemental_data.pdf [file supp_tpc.113.121350_tpc121350_Supplemental_data.pdf]

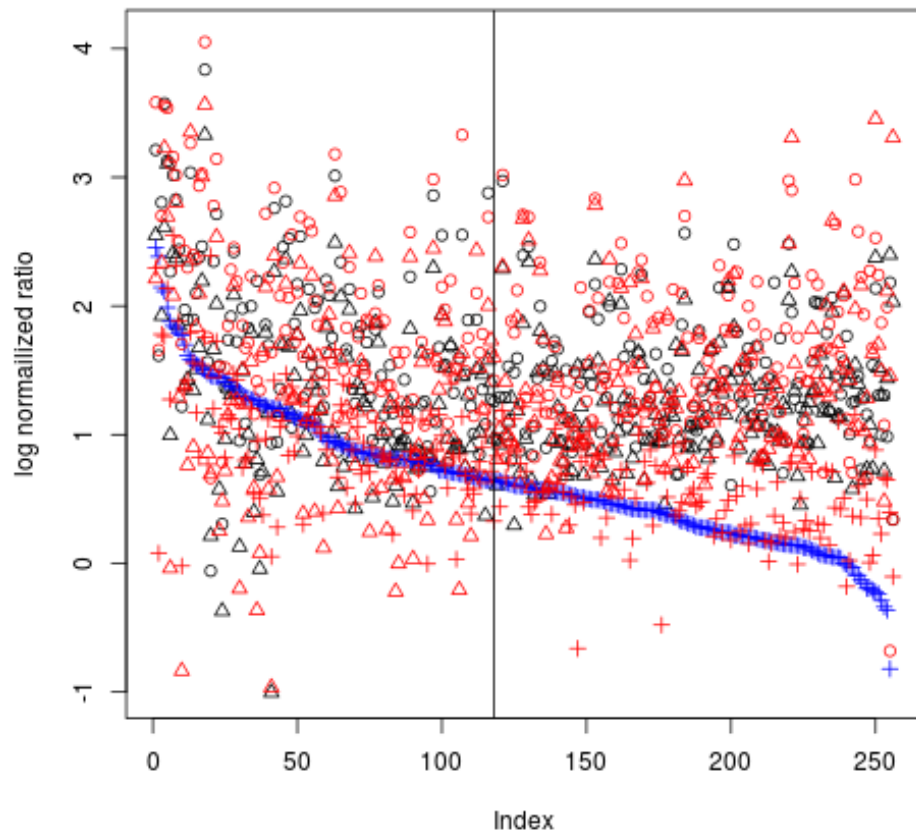

**Supplemental Figure 1.**

Plot of normalized ratios. The 256 loci which had mean normalized ratios greater than 2 in each of three experiments were plotted: pollination (black), pollen coat (red), Experiment 1 (circles), Experiment 2 (triangles), and Experiment 3 (crosses). The location of one of these loci, target *ACA13*, is indicated by a vertical line. There is a monotonic trend in the Experiment 3 data of pollination, indicated in blue.

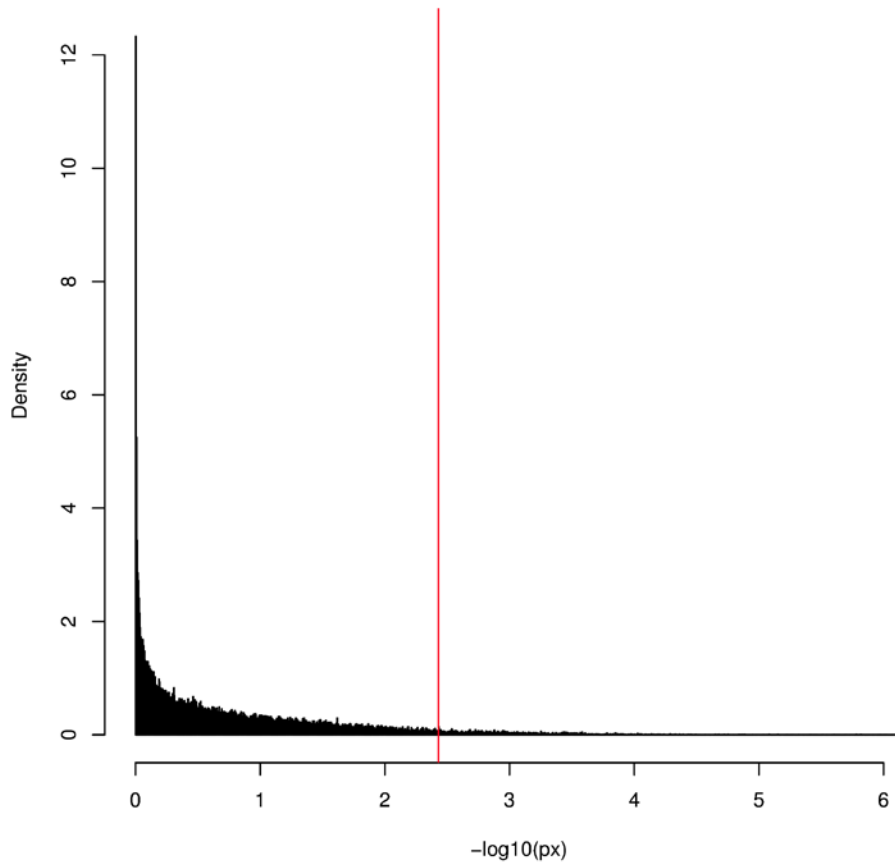

**Supplemental Figure 2.**

Histogram of  $P$  values for 27,205 loci according to a paired  $t$ -test.  $P$  values are expressed as the negative common logarithm ( $-\log_{10}$ ); a larger value means higher significance. The vertical red line indicates the  $P$  value for *ACA13*.

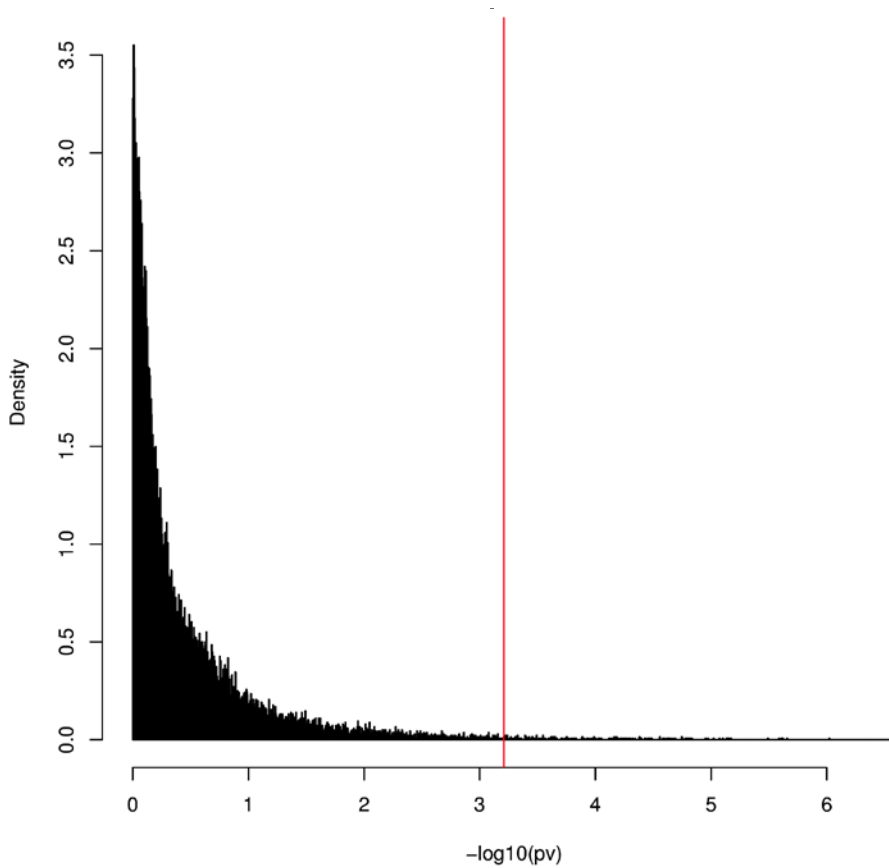

**Supplemental Figure 3.**

Histogram of  $P$  values for 27,205 loci according to ANOVA.  $P$  values are expressed as the negative common logarithm ( $-\log_{10}$ ). The vertical red line indicates the  $P$  value for ACA13.

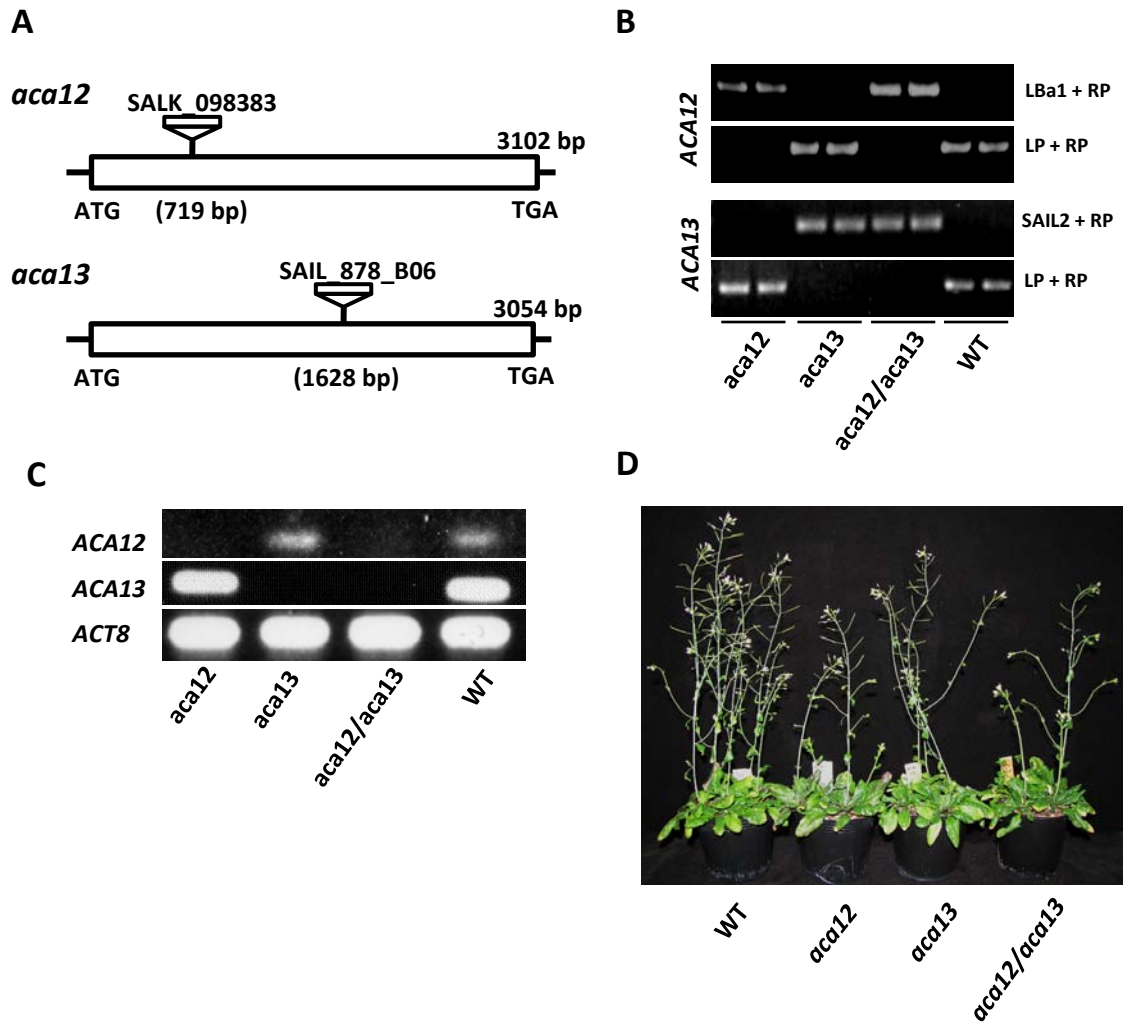

#### Supplemental Figure 4.

T-DNA mutants of *ACA12* and *ACA13*.

**(A)** Positions of T-DNA insertions in *aca12* and *aca13*.

**(B)** Homozygous insertions in *aca12*, *aca13* and *aca12/aca13* plants were checked by PCR. Bands generated by primer pairs LBa1 and RP (for *ACA12*) or SAIL2 and RP (for *ACA13*) represent T-DNA insertions, and bands generated by LP and RP primer pairs indicate no insertions.

**(C)** RT-PCR shows that expression of genes deleted in the mutants was abolished.

**(D)** WT, single and double *aca12* and *aca13* mutant plants.

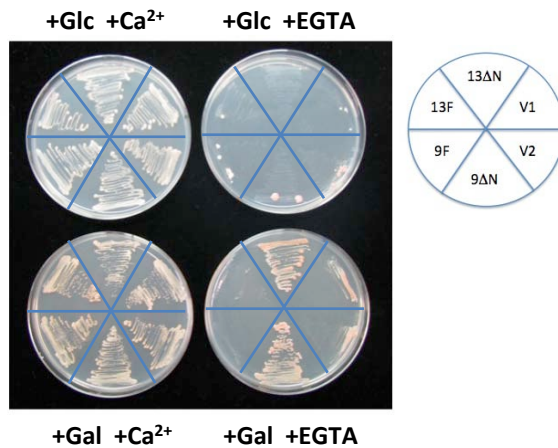

**Supplemental Figure 5.**

Complementation of yeast K616 by ACA13-Venus.

Growth of *Saccharomyces cerevisiae* mutant K616 (*pmc1pmr1cnb1*), on medium containing either galactose (Gal) or glucose (Glc) and either CaCl<sub>2</sub> or EGTA, was complemented with *GAL1:ΔN-ACA13-Venus* and *GAL1:ΔN-ACA9* in the pYES2 vector.

V1, *GAL1:Venus* in pYES2; V2, pYES2 empty vector; 13ΔN and 9ΔN, either *GAL1:ΔN-ACA13-Venus* or *GAL1:ΔN-ACA9* in pYES2; 13F and 9F, either *GAL1:ACA13-Venus* or *GAL1:ACA9* (full-length) in pYES2.
